# Supplementary material for: A giant Nernst power factor and figure-of-merit in polycrystalline NbSb2 for Ettingshausen refrigeration
Source: Royal Society of Chemistry journal article supplement (doi:10.1039/d3ee01450a), 2023-01-01
Supplement: d3ee01450a1.pdf [file d3ee01450a1.pdf]

## ***Supplementary information***

### **A giant Nernst power factor and figure-of-merit in polycrystalline NbSb<sub>2</sub> for Ettingshausen refrigeration**

Peng Li<sup>a,b</sup>, Pengfei Qiu<sup>a,b,c,\*</sup>, Jie Xiao<sup>a</sup>, Tingting Deng<sup>c</sup>, Lidong Chen<sup>a,b</sup>, and Xun Shi<sup>a,b,\*</sup>

<sup>a</sup>State Key Laboratory of High Performance Ceramics and Superfine Microstructure, Shanghai Institute of Ceramics, Chinese Academy of Science, Shanghai 200050, China

<sup>b</sup>Center of Materials Science and Optoelectronics Engineering, University of Chinese Academy of Sciences, Beijing 100049, China

<sup>c</sup>School of Chemistry and Materials Science, Hangzhou Institute for Advanced Study, University of Chinese Academy of Sciences, Hangzhou 310024, China

\*Email: [qiupf@mail.sic.ac.cn](mailto:qiupf@mail.sic.ac.cn); [xshi@mail.sic.ac.cn](mailto:xshi@mail.sic.ac.cn)

#### **Supplementary Note 1**

**Separation of the diffusion component ( $S_d^h - S_d^e$ ) and phonon-drag component ( $S_p^h - S_p^e$ ) from the measured Seebeck thermopower.**

Due to the large overlap (350 meV) of the conduction and valence bands<sup>1</sup>, NbSb<sub>2</sub> can be viewed as a strong degenerate system, where the diffusion component of Seebeck thermopower of electrons and holes varies linearly with temperature<sup>2</sup>. Therefore, the phonon-drag component ( $S_p^h - S_p^e$ ) can be obtained by subtracting the linear extrapolation of diffusion component ( $S_d^h - S_d^e$ ) from the total Seebeck thermopower difference ( $S_{xx}^h - S_{xx}^e$ )<sup>3</sup>. As shown in Figure 4f, for single-crystalline and polycrystalline NbSb<sub>2</sub>, ( $S_d^h - S_d^e$ ) dominates above 80 K, and ( $S_p^h - S_p^e$ ) dominates over the ( $S_d^h - S_d^e$ ) below 80 K.

#### **Supplementary Note 2**

**Derivation process of Nernst figure-of-merit  $z_N$**

Figure S1 shows the schematics of a rectangular Ettingshausen refrigerator, with the dimensions along the temperature difference direction, the current direction, and the applied magnetic field direction as  $L_x$ ,  $L_y$ , and  $L_z$ , respectively. The temperature gradient in the  $x$ -direction is  $\nabla_x T$ . The electric field strength in the  $y$ -direction is  $\epsilon_y$ . In unit time, the amount of heat extracted by the Ettingshausen effect is  $S_{yx} T_l \epsilon_y \sigma_{yy} L_y L_z$ , where  $S_{yx}$  is the Nernst thermopower,  $T_l$  is the temperature of the cold end, and  $\sigma_{yy}$  is the electrical conductivity along the  $y$ -axis. The Joule heat flowing into the cold end is  $\frac{1}{2} \epsilon_y^2 \sigma_{yy} L_x L_y L_z$  and the heat of conduction from the hot end to the cold end is  $\kappa_{xx} \nabla_x T L_y L_z$ , where  $\kappa_{xx}$  is the thermal conductivity along the  $x$ -axis. The refrigeration capacity of the cold end per unit of time  $Q_{in}$  is

$$Q_{in} = \left[ S_{yx} T_l \epsilon_y \sigma_{yy} - \frac{1}{2} \epsilon_y^2 \sigma_{yy} L_x - \kappa_{xx} \nabla_x T \right] L_y L_z \quad (S1)$$

The input power  $P$  of the Ettingshausen refrigerator is

$$P = (\epsilon_y^2 \sigma_{yy} + S_{yx} \nabla_x T \epsilon_y \sigma_{yy}) L_x L_y L_z \quad (S2)$$

The COP of the Ettingshausen refrigerator is

$$COP = \frac{Q_{in}}{P} = \frac{S_{yx} T_l \epsilon_y \sigma_{yy} - \frac{1}{2} \epsilon_y^2 \sigma_{yy} L_x - \kappa_{xx} \nabla_x T}{(\epsilon_y^2 \sigma_{yy} + S_{yx} \nabla_x T \epsilon_y \sigma_{yy}) L_x} \quad (S3)$$

According to  $dCOP/d\epsilon_y = 0$ , the optimum electric field strength is

$$\epsilon_{y,COP} = S_{yx} \nabla_x T \frac{1}{\sqrt{1 + z_N \bar{T}} - 1} \quad (S4)$$

In this case, the maximum COP can be obtained as

$$COP_{max} = \frac{T_l \sqrt{1 + z_N \bar{T}} - \frac{T_h}{T_l}}{T_h - T_l \sqrt{1 + z_N \bar{T}} + 1} \quad (S5)$$

where  $z_N$  is  $\frac{S_{yx}^2 \sigma_{yy}}{\kappa_{xx}}$  and  $\bar{T}$  is the average temperature of hot end and cold end  $\frac{1}{2}(T_h + T_l)$ .

Thus, the  $z_N$  is a parameter that independent on the material's geometric factors.

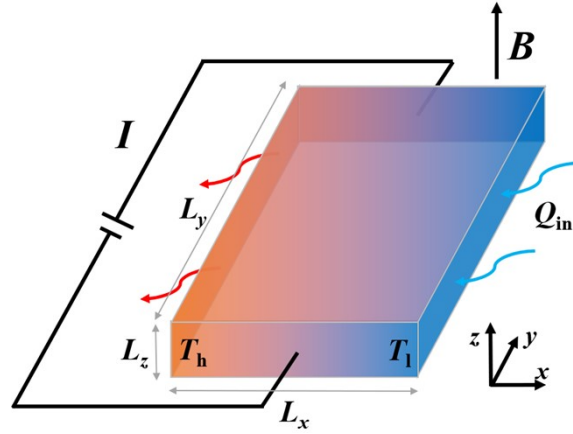

Figure S1 Schematics of a rectangular Ettingshausen refrigerator.

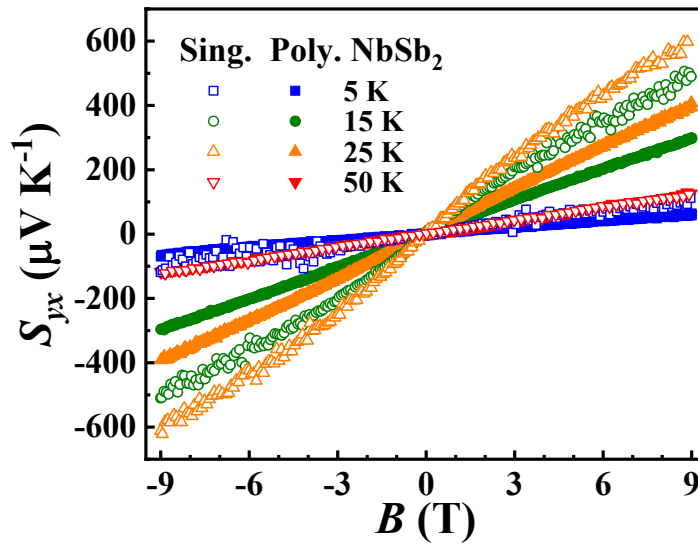

**Figure S2** Magnetic field dependences of Nernst thermopower  $S_{yx}$  of polycrystalline NbSb<sub>2</sub> at different temperatures. The data of single-crystalline NbSb<sub>2</sub> are included for comparison<sup>1</sup>.

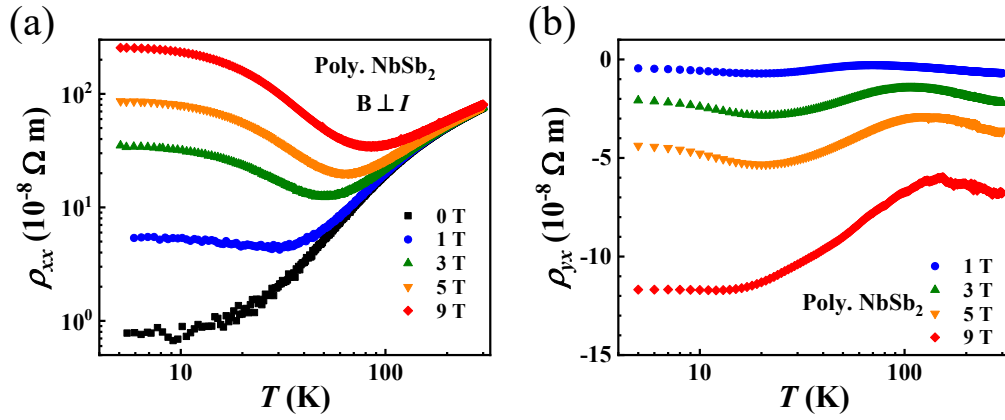

**Figure S3** Temperature dependence of (a) electrical resistivity  $\rho_{xx}$  and (b) Hall resistivity  $\rho_{yx}$  for polycrystalline NbSb<sub>2</sub> under different magnetic fields.

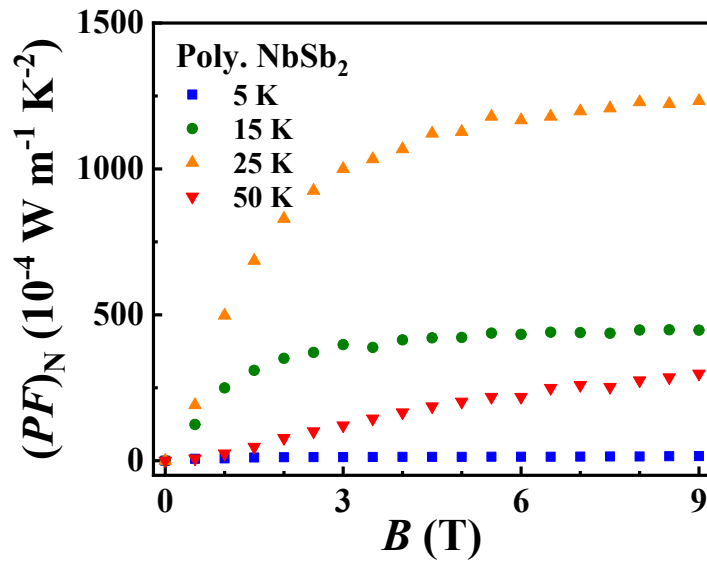

**Figure S4** Magnetic field dependence of Nernst power factor  $(PF)_N$  for polycrystalline NbSb<sub>2</sub> at different temperatures.

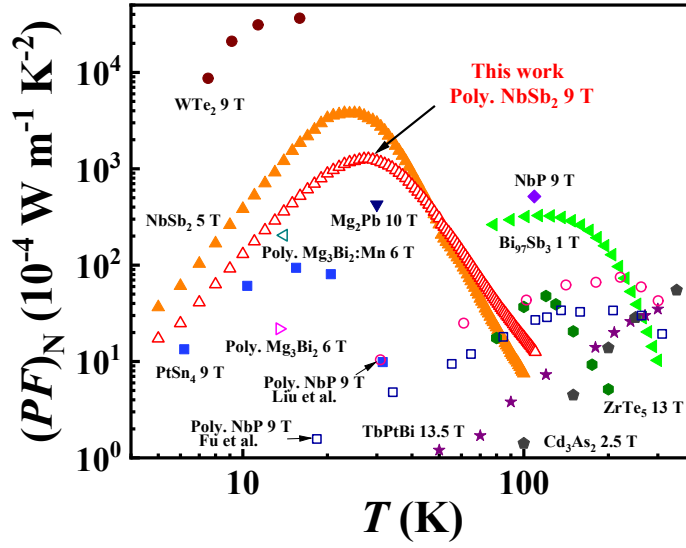

**Figure S5** Temperature dependences of  $(PF)_N$  typical polycrystalline thermomagnetic materials under different magnetic fields. The data are taken from References 1, 4-16. The hollow symbols are for polycrystals, while the solid symbols are for single crystals.

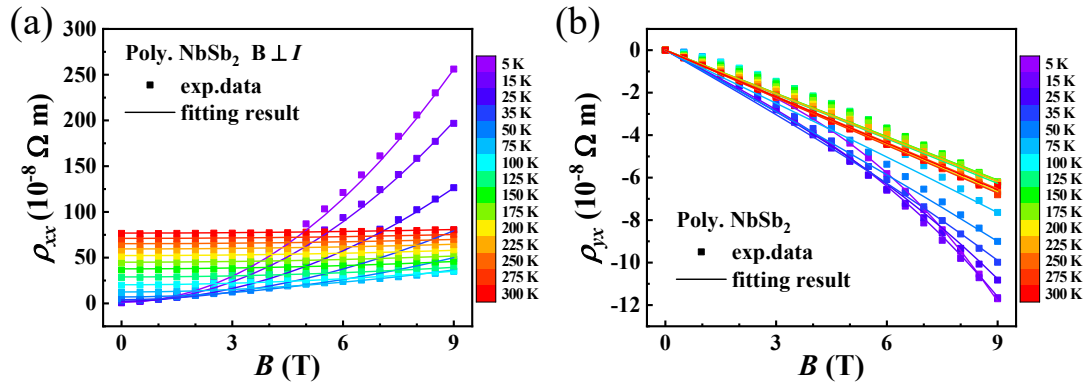

**Figure S6** Fitting of the (a) electrical resistivity  $\rho_{xx}(B)$  and (b) Hall resistivity  $\rho_{yx}(B)$  for polycrystalline NbSb<sub>2</sub> under different temperatures. The symbols are experimental data and the lines are the fitting curves.

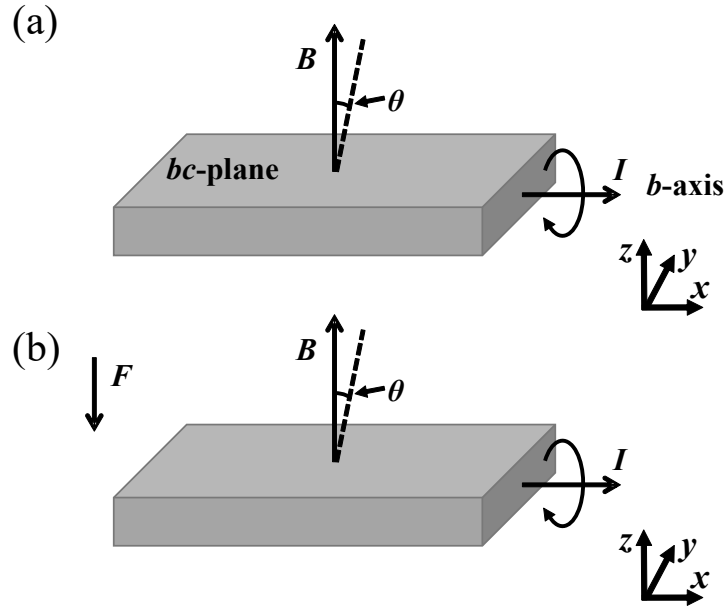

**Figure S7** Schematic diagram of the angle dependence of electrical resistivity  $\rho$  measurement for (a) single-crystalline NbSb<sub>2</sub> and (b) polycrystalline NbSb<sub>2</sub>.  $F$  represent the direction of the sintering pressure of polycrystalline NbSb<sub>2</sub>.

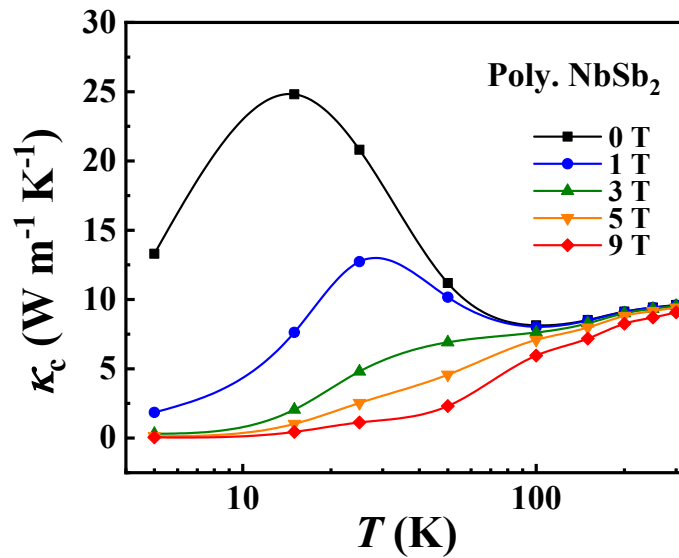

**Figure S8** Temperature dependence of the carrier thermal conductivity  $\kappa_c$  for polycrystalline NbSb<sub>2</sub> at different magnetic fields obtained from the empirical equation.

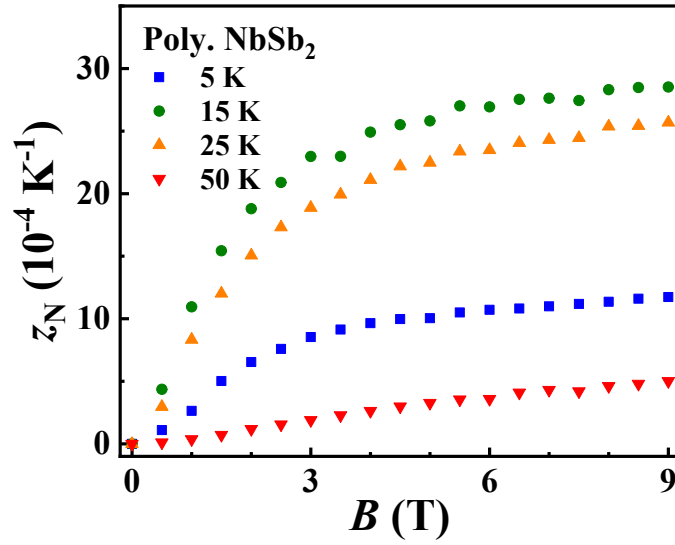

**Figure S9** Magnetic field dependence of Nernst figure-of-merit  $z_N$  for polycrystalline NbSb<sub>2</sub> at different temperatures.

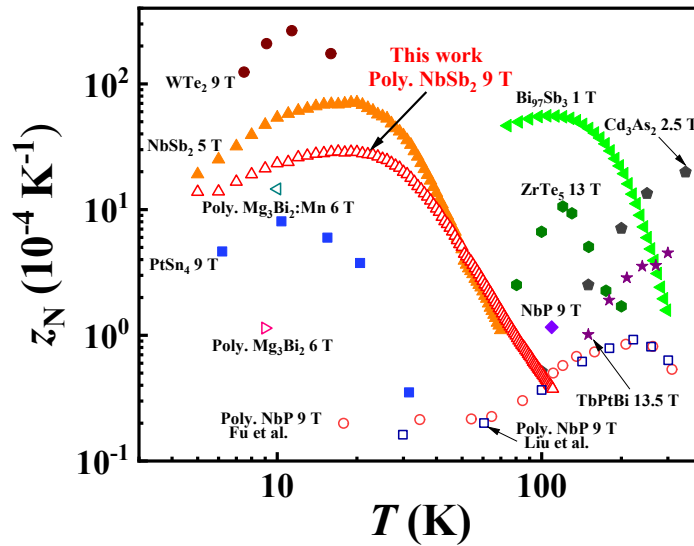

**Figure S10** Temperature dependences of Nernst figure-of-merit  $z_N$  of typical polycrystalline thermomagnetic materials under different magnetic fields. The data are taken from References 1, 5-16. The hollow symbols are for polycrystals, while the solid symbols are for single crystals.

**Table S1** Parameters used to fit the measured thermal conductivity of polycrystalline NbSb<sub>2</sub>.

| $T$ (K) | $\kappa_l$ (W m <sup>-1</sup> K <sup>-1</sup> ) | $\kappa_c(0,T)$ (W m <sup>-1</sup> K <sup>-1</sup> ) | $\eta^{1/s}$ (T <sup>-1</sup> ) | $s$  |
|---------|-------------------------------------------------|------------------------------------------------------|---------------------------------|------|
| 5       | 1.18                                            | 13.30                                                | 2.83                            | 1.75 |
| 15      | 15.15                                           | 24.81                                                | 1.75                            | 1.45 |
| 25      | 47.59                                           | 20.81                                                | 0.74                            | 1.51 |
| 50      | 57.12                                           | 11.19                                                | 0.25                            | 1.66 |
| 100     | 29.31                                           | 8.13                                                 | 0.058                           | 1.55 |
| 150     | 20.08                                           | 8.52                                                 | 0.042                           | 1.72 |
| 200     | 15.95                                           | 9.13                                                 | 0.033                           | 1.85 |
| 250     | 14.22                                           | 9.42                                                 | 0.030                           | 1.91 |
| 300     | 13.72                                           | 9.61                                                 | 0.025                           | 1.89 |



## Supplementary references

1. P. Li, P. Qiu, Q. Xu, J. Luo, Y. Xiong, J. Xiao, N. Aryal, Q. Li, L. Chen and X. Shi, *Nat. Commun.*, 2022, **13**, 7612.
2. F. J. Blatt, P. A. Schroeder, C. L. Foiles and D. Greig, *Thermoelectric power of metals*, Plenum Press, New York and London, 1976.
3. V. D. Kagan, N. A. Red'ko, N. A. Rodionov, V. I. Pol'shin and O. V. Zotova, *Physics of the Solid State*, 2004, **46**, 1410-1419.
4. Z. Chen, X. Zhang, J. Ren, Z. Zeng, Y. Chen, J. He, L. Chen and Y. Pei, *Nat. Commun.*, 2021, **12**, 3837.
5. C. Fu, S. N. Guin, T. Scaffidi, Y. Sun, R. Saha, S. J. Watzman, A. K. Srivastava, G. Li, W. Schnelle, S. S. P. Parkin, C. Felser and J. Gooth, *Research*, 2020, **2020**, 4643507.
6. Y. Pan, B. He, T. Helm, D. Chen, W. Schnelle and C. Felser, *Nat. Commun.*, 2022, **13**, 3909.
7. K. F. Cuff, R. B. Horst, J. L. Weaver, S. R. Hawkins, C. F. Kooi and G. M. Enslow, *Appl. Phys. Lett.*, 1963, **2**, 145-146.
8. P. Wang, C. Cho, F. Tang, P. Wang, W. Zhang, M. He, G. Gu, X. Wu, Y. Shao and L. Zhang, *Phys. Rev. B*, 2021, **103**, 045203.
9. S. J. Watzman, T. M. McCormick, C. Shekhar, S.-C. Wu, Y. Sun, A. Prakash, C. Felser, N. Trivedi and J. P. Heremans, *Phys. Rev. B*, 2018, **97**, 161404(R).
10. C. Shekhar, A. K. Nayak, Y. Sun, M. Schmidt, M. Nicklas, I. Leermakers, U. Zeitler, Y. Skourski, J. Wosnitza, Z. Liu, Y. Chen, W. Schnelle, H. Borrmann, Y. Grin, C. Felser and B. Yan, *Nat. Phys.*, 2015, **11**, 645-649.
11. J. Xiang, S. Hu, M. Lyu, W. Zhu, C. Ma, Z. Chen, F. Steglich, G. Chen and P. Sun, *Sci. China: Phys., Mech. Astron.*, 2019, **63**, 237011.
12. H. Wang, Z. Zhou, J. Ying, Z. Xiang, R. Wang, A. Wang, Y. Chai, M. He, X. Lu, G. Han, Y. Pan, G. Wang, X. Zhou and X. Chen, *Adv. Mater.*, 2023, **35**, 2206941.
13. T. Feng, P. Wang, Z. Han, L. Zhou, W. Zhang, Q. Liu and W. Liu, *Adv. Mater.*, 2022, **34**, 2200931.
14. T. Feng, P. Wang, Z. Han, L. Zhou, Z. Wang, W. Zhang, Q. Liu and W. Liu, *Energy Environ. Sci.*, 2023, **16**, 1560-1568.
15. C. Fu, S. N. Guin, S. J. Watzman, G. Li, E. Liu, N. Kumar, V. Süß, W. Schnelle, G. Auffermann, C. Shekhar, Y. Sun, J. Gooth and C. Felser, *Energy Environ. Sci.*, 2018, **11**, 2813-2820.
16. W. Liu, Z. Wang, J. Wang, H. Bai, Z. Li, J. Sun, X. Zhou, J. Luo, W. Wang, C. Zhang, J. Wu, Y. Sun, Z. Zhu, Q. Zhang and X. Tang, *Adv. Funct. Mater.*, 2022, **32**, 2202143.
